# Supplementary material
Source: PubMed Central journal article supplement (PMC4508497)
Supplement: thnov05p1068s1.pdf [file thnov05p1068s1.pdf]

## Supplementary Figure 1

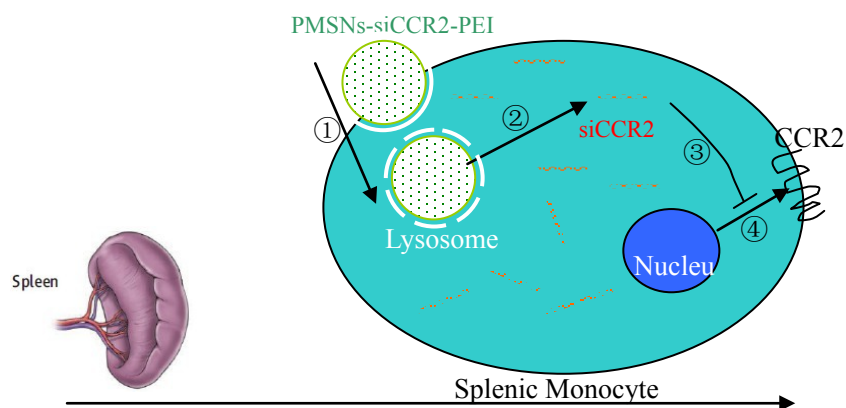

**Supplementary Figure 1.** Illustration the silence of CCR2 in splenic Ly6C<sup>high</sup> monocytes, ①The particles of PMSNs-siCCR2-PEI were first phagocytized by the lysosome of monocytes in the spleen; ②Under the proton sponge effect of PEI, lysosomal bursts and siCCR2 released from PMSNs at 37°C; ③and④ siCCR2 silence the mRNA of CCR2 from the nucleus and the synthesis of CCR2 was reduced.

## Supplementary Figure 2

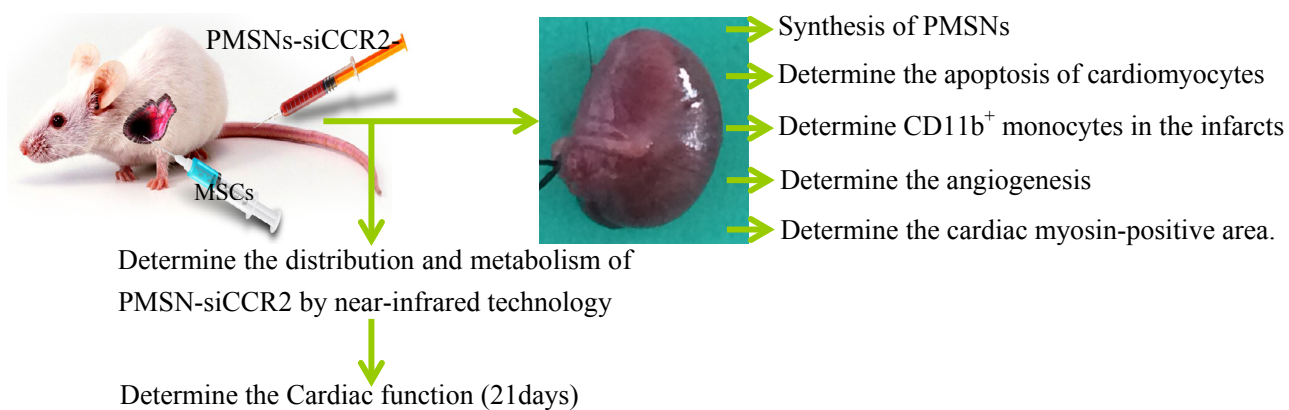

**Supplementary Figure 2.** Approximate procedure of the experiment in vivo: The distribution and metabolism of PMSN-siCCR2 were first tested in the 24h; CD11b-positive monocytes in the infarcts were then identified at day1; the survival of Transplanted MSCs and the apoptosis of cardiomyocytes were identified at day3; the angiogenesis and the cardiac myosin-positive area as well as Cardiac function were determined at day21.

### Supplementary Figure 3

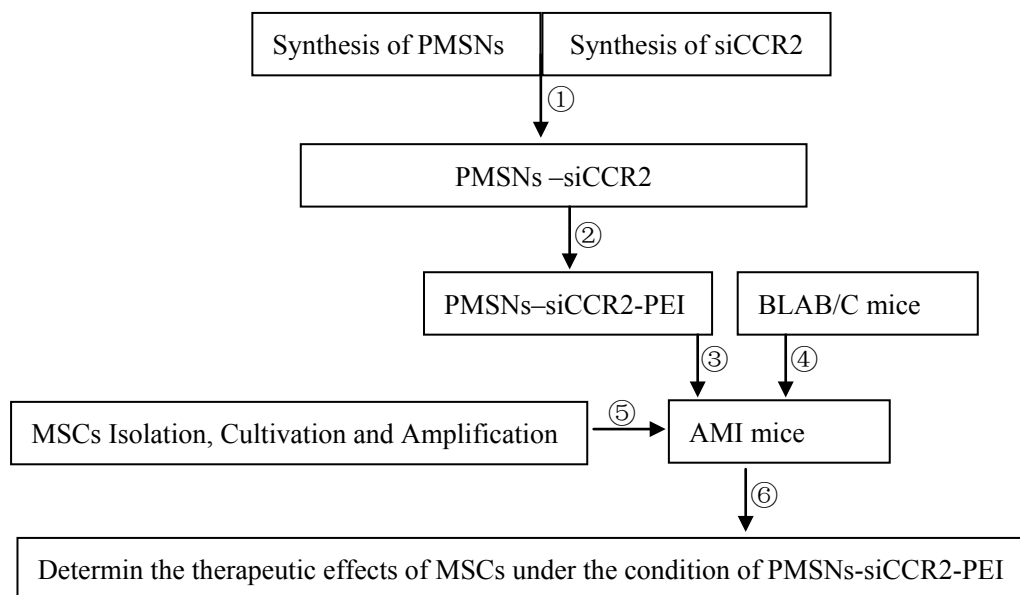

**Supplementary Figure 3.** Brief flowchart for the whole process of study. ①Loading siCCR2 into PMSNs; ②PEI coating on the external surface of siRNA-loaded PMSNs; ③PMSNs-siCCR2 (25 $\mu$ g/g) were also intravenously injected via the tail vein; ④An anterior wall MI was induced by direct ligation of the left anterior descending (LAD) artery; ⑤MSCs were injected into the borderline area of the infarct; ⑥The therapeutic effects of PMSNs-siCCR2 for MSC transplantation were determined at the mRNA, protein and functional levels.

### Supplementary Figure 4

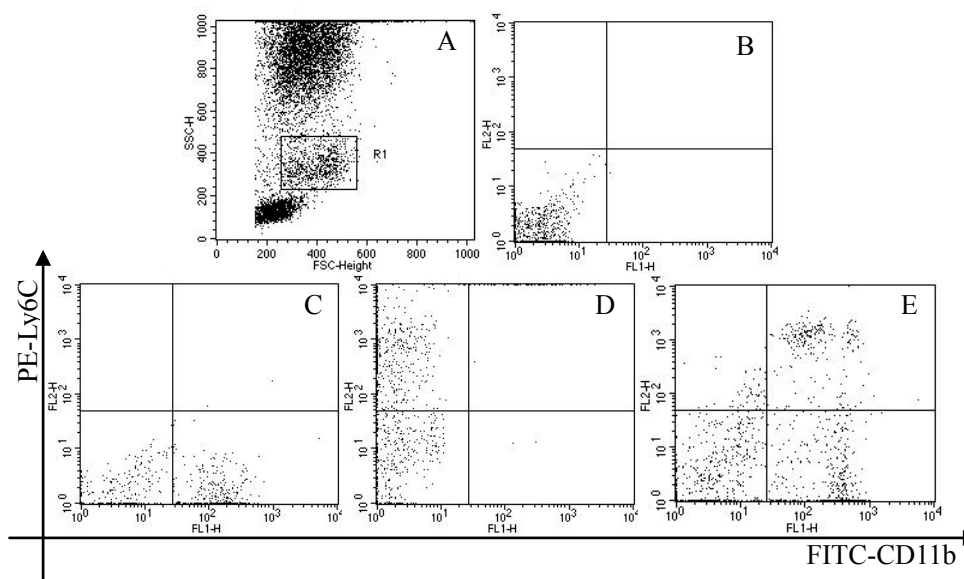

**Supplementary Figure 4.** Brief flowchart of the FACS gating strategies for inflammatory monocyte. A, Mononuclear Cells were first gated for the further analysis; B, Mononuclear Cells without fluorescent antibody served as control; C, FITC-CD11b was used to identify the monocytes; D, PE-Ly6C was further used to identify the cells; E, CD11b and Ly6C double positive monocytes were gated.

**Supplementary Table 1**

| Mice                                     | ALT ( U/L) | AST( U/L) | ALP( U/L) | TBIL (umol/L) | BUN (mmol/L) | Cr (umol/L) |
|------------------------------------------|------------|-----------|-----------|---------------|--------------|-------------|
| AMI mice (n=12)                          | 17.1±3.11  | 11.0±0.79 | 63.2±17.7 | 1.01±0.12     | 9.57±1.03    | 8.81±2.45   |
| AMI mice given<br>PMSNs-siCCR2-PEI(n=12) | 19.4±2.47  | 11.3±0.52 | 56.5±15.4 | 1.17±0.13     | 9.21±2.07    | 9.06±1.79   |
| <i>P-value</i>                           | 0.133      | 0.294     | 0.073     | 0.425         | 0.096        | 0.159       |

**Supplementary Table 1.** Hepatic and renal function of the mice treated with or without PMSN-siCCR2-PEI at 24h. ALT, Alanine aminotransferase; AST, Aspartate aminotransferase; BUN, Urea nitrogen; Cr, creatinine; TBIL, Total bilirubin. \* $P < 0.05$  vs. AMI mice.

**Supplementary Table 2.**

| Group              | LvEF                   | LVID.s<br>(mm) | LVID.d<br>(mm) | LVPW.s<br>(mm) | LVPW.d<br>(mm) | LV Vol.s<br>(uL) | LV Vol.d<br>(uL) |
|--------------------|------------------------|----------------|----------------|----------------|----------------|------------------|------------------|
| Control(day1)      | 0.33±0.04              | 4.08±0.45      | 3.55±0.28      | 1.21±0.19      | 0.94±0.12      | 30.42±5.19       | 45.40±5.66       |
| Control(day21)     | 0.42±0.02              | 3.71±0.29      | 2.80±0.61      | 0.99±0.14      | 0.61±0.08      | 43.95±6.40       | 75.80±9.79       |
| PMSN-siCCR2(day1)  | 0.34±0.05              | 3.83±0.79      | 3.14±0.44      | 1.17±0.22      | 1.01±0.30      | 27.75±4.21       | 42.06±8.73       |
| PMSN-siCCR2(day21) | 0.49±0.09 <sup>#</sup> | 3.22±0.36      | 2.54±0.53      | 1.02±0.13      | 0.84±0.11      | 32.83±5.11       | 64.36±10.31      |

**Supplementary Table 2.** Cardiac functions of the mice in two groups at different time. LvEF, Left ventricular Ejection Fraction; LVID.d/s, Interventricular Septal Thickness at Diastole/ Systole; LVPW.d/s, Left ventricular posterior wall thickness at Diastole/Systole; LV Vol.d/s, Left ventricular end-diastolic/systolic volume ; \* $p < 0.05$  vs. the corresponding control group at 21 days; <sup>#</sup> $p < 0.05$  vs. the corresponding control group at day1post AMI.
